# Supplementary material for: miR-182 suppresses invadopodia formation and metastasis in non-small cell lung cancer by targeting cortactin gene
Source: PubMed Central journal article supplement (PMC6038252; doi:10.1186/s13046-018-0824-1), 2018-07-09
Supplement: 13046_2018_824_MOESM1_ESM.pdf [file 13046_2018_824_MOESM1_ESM.pdf]

**Supplementary Table 1** Basic information of 55 patients with  
NSCLC

| <b>Characteristic</b> | <b>N (%)</b> |
|-----------------------|--------------|
| Gender                |              |
| Male                  | 35 (63.6%)   |
| Female                | 20 (36.4%)   |
| Age                   |              |
| >60                   | 29 (52.7%)   |
| ≤60                   | 26 (47.3%)   |
| Histology             |              |
| AD                    | 25 (45.5%)   |
| SCC                   | 24 (43.6%)   |
| ASC                   | 3 (5.45%)    |
| Others                | 3 (5.45%)    |
| Smoking history       |              |
| Nonsmoker             | 19 (34.5%)   |
| Smoker                | 36 (65.5%)   |
| Metastasis            |              |
| None                  | 13 (23.6%)   |
| Yes                   | 42 (76.4%)   |
| Clinical Stage        |              |
| I                     | 2 (3.7%)     |
| II                    | 32 (58.2%)   |
| III                   | 13 (23.6%)   |
| IV                    | 8 (14.5%)    |
